# Supplementary material for: Relationships between substrate, surface characteristics, and vegetation in an initial ecosystem
Source: Copernicus journal article supplement (doi:10.5194/bg-10-8283-2013), 2013-12-16
Supplement: Supplementary file 1 [file bg-10-8283-2013-supplement.pdf]

## **Relationships between Substrate, Surface Characteristics, and Vegetation in an Initial Ecosystem**

by

**P. Biber, S. Seifert, M. K. Zaplata, W. Schaaf, H. Pretzsch, and A. Fischer**

This supplement gives an extensive graphical presentation of the data used in this study. While the Figures listed here are not necessary to understand the main article, they may be helpful for readers who would like to get a more detailed view. Each supplemental figure is referenced in the main text, corresponding variable definitions and summarizing tables can be taken there from Tables 1, 2, and 3. Unused grid points as shown in some figures were not measured due to intensive monitoring instrumentation in these places.

### **Figure Captions**

Figure S1: Total degree of plant cover COVTOT [%] (cf. Tables 1, 3) in spatio-temporal display.

Figure S2: Degree of cover by annual plants COVANN [%] (cf. Table 3) in spatio-temporal display.

Figure S3: Degree of cover by herbaceous plants COVHERB [%] (cf. Table 3) in spatio-temporal display.

Figure S4: Degree of cover by *Fabaceae* COVFAB [%] (cf. Table 3) in spatio-temporal display.

Figure S5: Degree of cover by perennial plants COVPER [%] (cf. Table 3) in spatio-temporal display.

Figure S6: Degree of cover by grasslike plants COVGRASS [%] (cf. Table 3) in spatio-temporal display.

Figure S7: Degree of cover by woody plants COVWOOD [%] (cf. Table 3) in spatio-temporal display.

Figure S8: Proportion of annual plant cover related to total plant cover (PROPANN, cf. Tables 1, 2) in spatio-temporal display.

Figure S9: Proportion of herbaceous plant cover related to total plant cover (PROPHERB, cf. Tables 1, 2) in spatio-temporal display.

Figure S10: Proportion of grasslike plant cover related to total plant cover (PROPGRASS, cf. Tables 1, 2) in spatio-temporal display.

Figure S11: Proportion of cover of plants belonging to the *Fabaceae* family related to total plant cover (PROPFAB, cf. Tables 1, 2) in spatio-temporal display.

Figure S12: Proportion of cover of woody plants related to total plant cover (PROPWOOD, cf. Tables 1, 2) in spatio-temporal display.

Figure S13: Soil properties Percentage of organic carbon in the soil (CORGP), Percentage of gravel content in the soil (GRAVCONT), and Percentage of medium sand (0.2 - 0.63 mm) in the soil (MSAND) as measured in 2005 (cf. Tables 1, 2) in spatio-temporal display.

Figure S14: Mean annual ground water level below surface GAUGE [m] (cf. Tables 1, 2) in spatio-temporal display.

Figure S15: Laser-scanned mean vegetation height VEGHEIGHT [m] (cf. Tables 1, 2) in spatio-temporal display.

Figure S16: Laser-scanned mean vegetation density VEGDENS (cf. Tables 1, 2) in spatio-temporal display.

Figure S17: Product of the mean vegetation height und vegetation density VEGDH (cf. Tables 1, 2) in spatio-temporal display.

Figure S18: Proportion of laser scan cells classified as belonging to a rill related to the total amount of laser scan cells per vegetation plot RILLR (cf. Tables 1, 2) in spatio-temporal display.

Figure S19: Mean value of local relief energy RELEN (cf. Tables 1, 2) in spatio-temporal display.

Figure S20: Mean ground surface elevation changes DHEIGHT [m] (cf. Tables 1, 2) between September 2008 - May 2009, May 2009 - April 2010, and April 2010 - February 2011 in spatio-temporal display. Positive values of DHEIGHT indicate an increase of the surface height indicating a net gain of substrate material in the vegetation square, while negative values indicate a net substrate material export (erosion) from the respective square.

Figure S21: Initial network of erosion channels in November 2005. The circles indicate the perpendicular erosion channels in the upper part and rectangles mark the parallel channels in the lower western part of the area corresponding to caterpillar tracks. Figure taken from Schaaf et al. (2012).

Figure S22: Boxplot of the rill cell frequency (RILLR) against the distance to the grid row A on the catchment (see Figure 1). Due to other confounding variables the minimum around DISTA values about 50 – 150 m is less visible than in the results of the statistical analysis (Figure 2).

Figure S23: Boxplot of local relief energy (RELEN) against the distance to the grid row A on the catchment (see Figure 1). Due to other confounding variables the minimum around

DISTA values about 50 – 150 m is less visible than in the results of the statistical analysis (Figure 3).

COVTOT  
2006

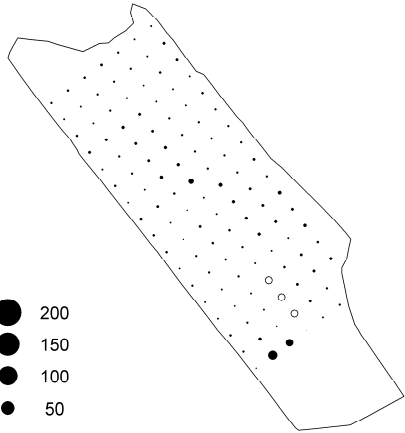

COVTOT  
2007

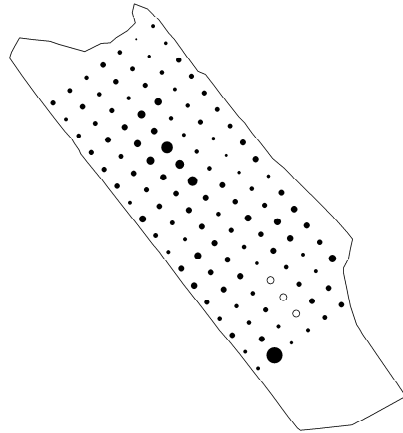

COVTOT  
2008

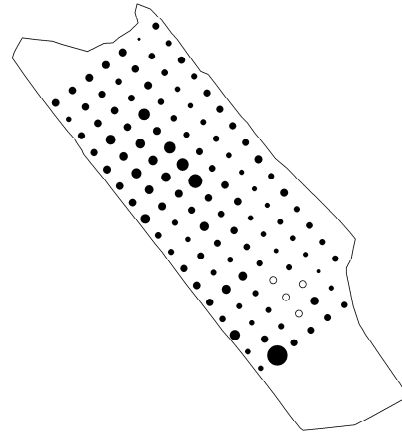

COVTOT  
2009

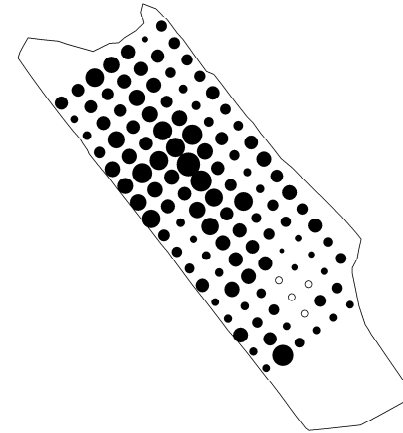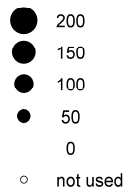

COVTOT  
2010

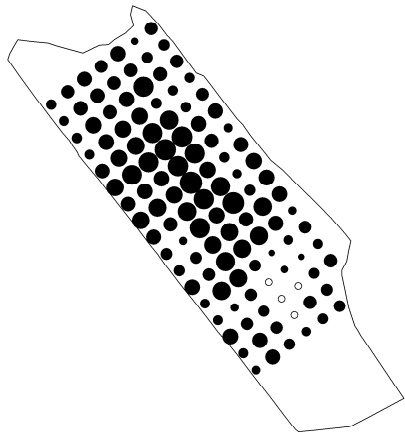

COVTOT  
2011

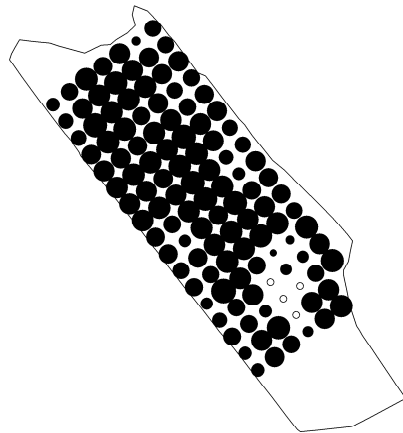

Figure S1

COVANN  
2006

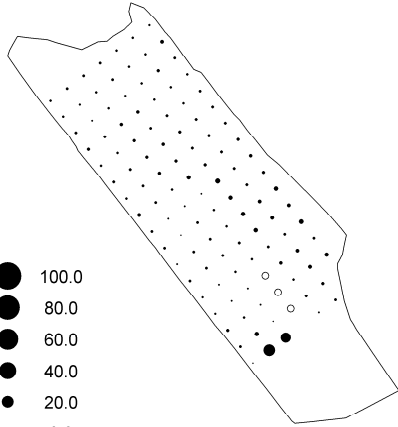

COVANN  
2007

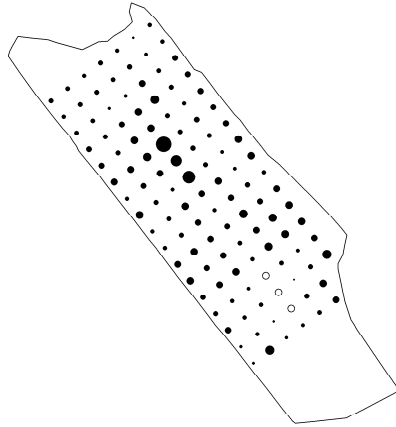

COVANN  
2008

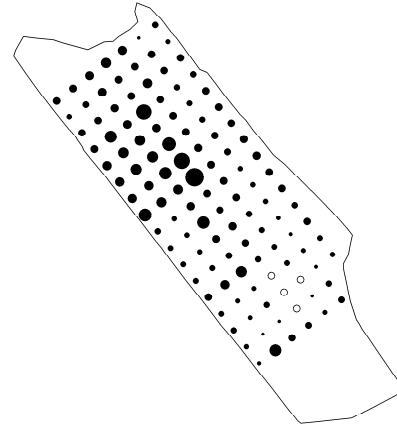

COVANN  
2009

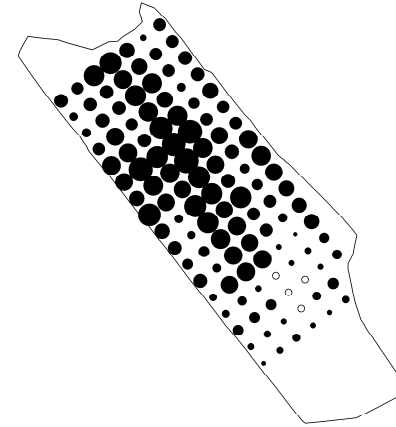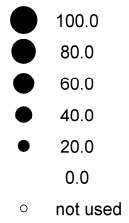

COVANN  
2010

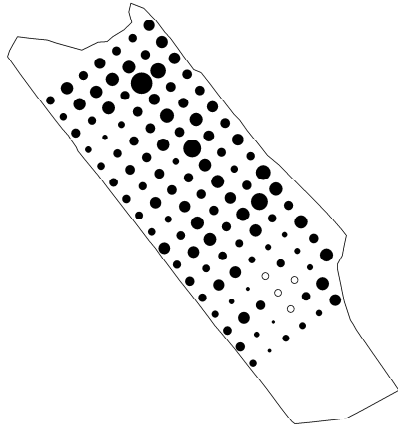

COVANN  
2011

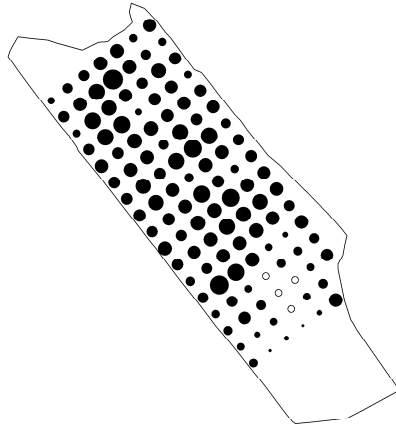

Figure S2

COVHERB  
2006

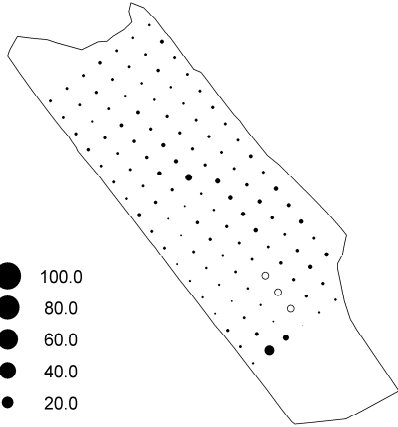

COVHERB  
2007

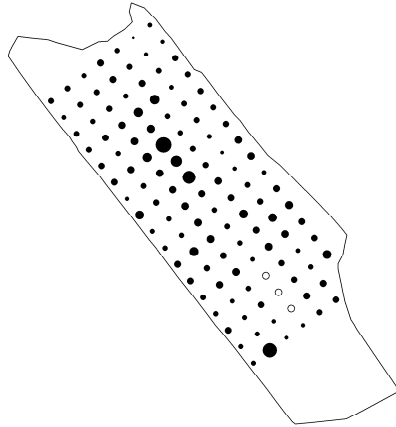

COVHERB  
2008

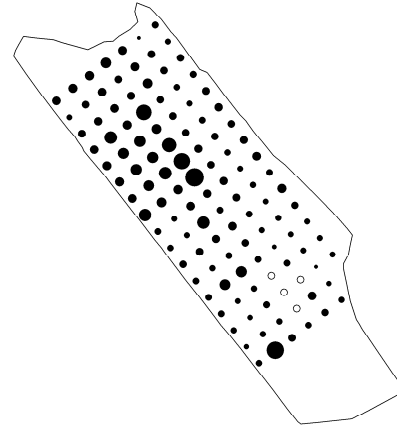

COVHERB  
2009

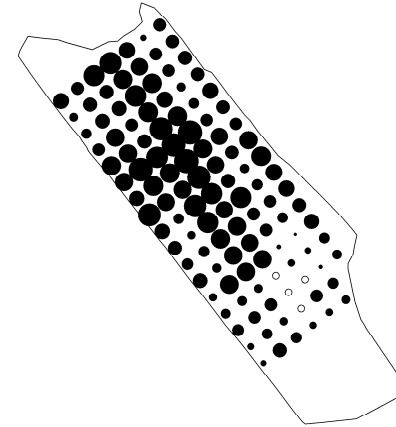

COVHERB  
2010

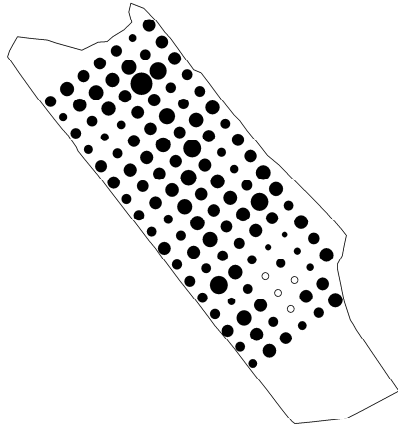

COVHERB  
2011

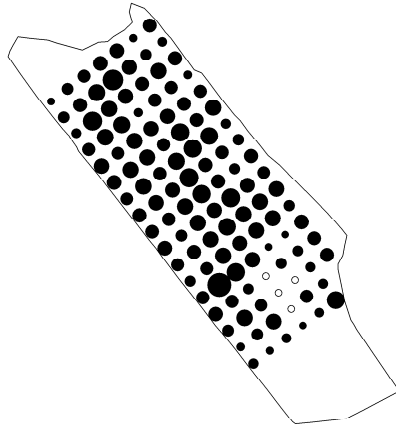

Figure S3

COVFAB  
2006

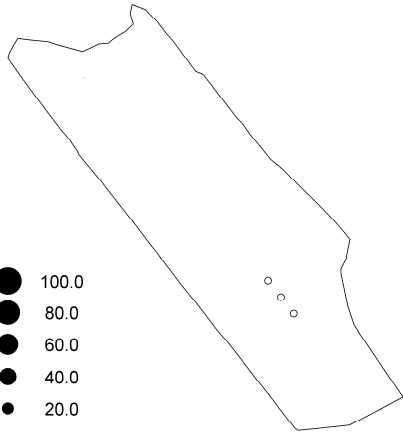

COVFAB  
2007

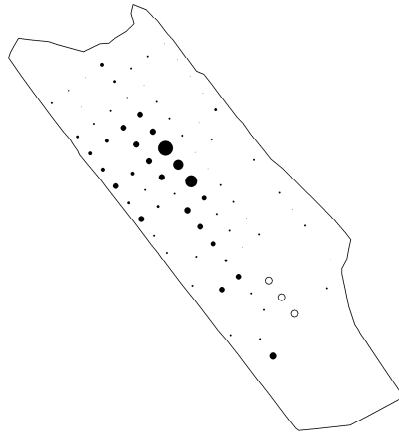

COVFAB  
2008

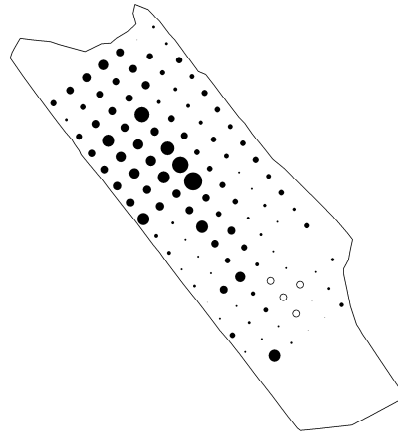

COVFAB  
2009

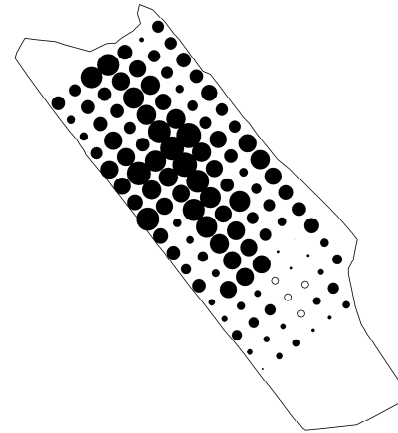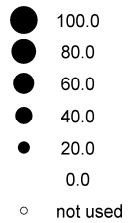

COVFAB  
2010

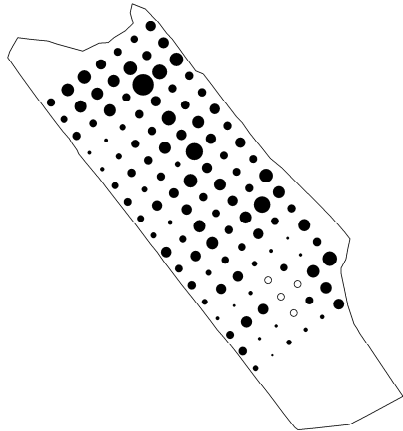

COVFAB  
2011

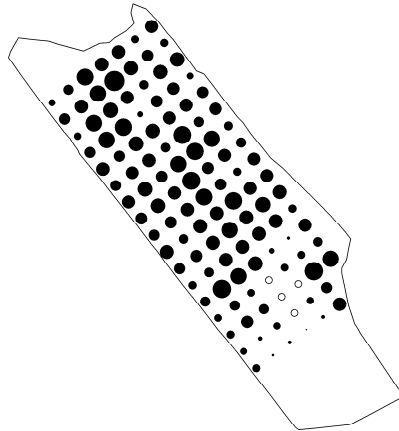

Figure S4

COVER  
2006

COVER  
2007

COVER  
2008

COVER  
2009

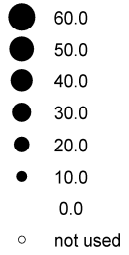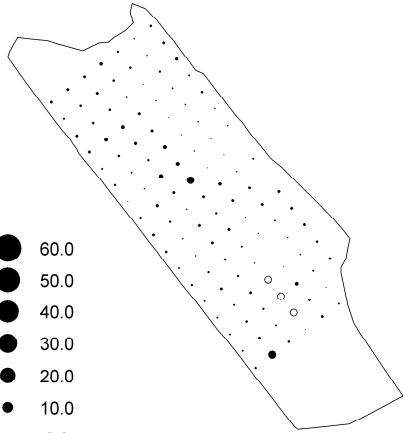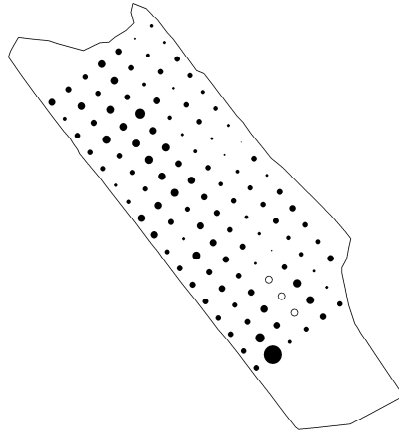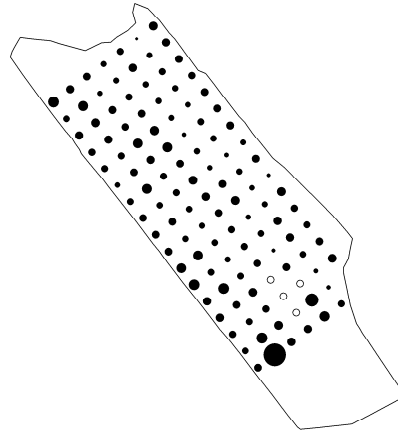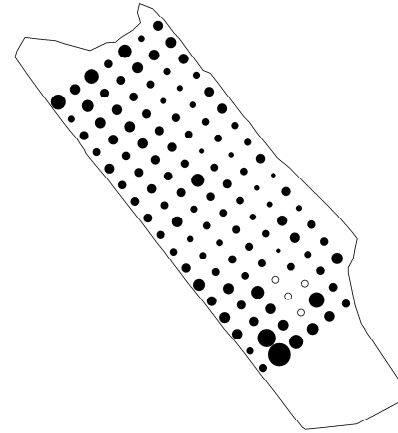

COVER  
2010

COVER  
2011

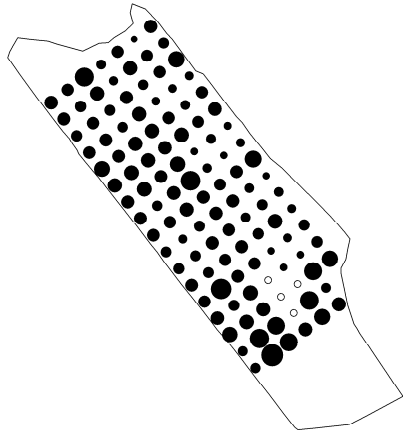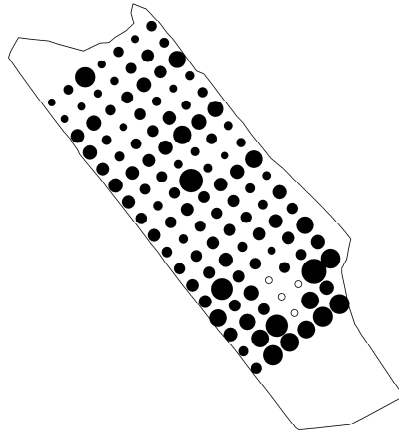

Figure S5



COVGRASS  
2006

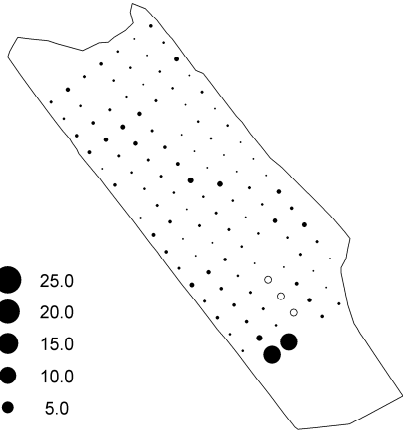

COVGRASS  
2007

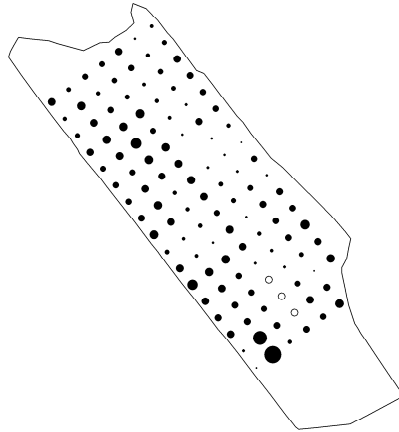

COVGRASS  
2008

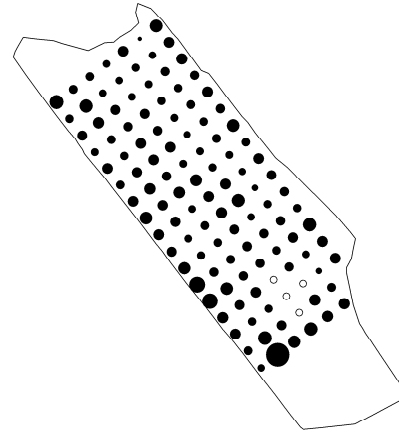

COVGRASS  
2009

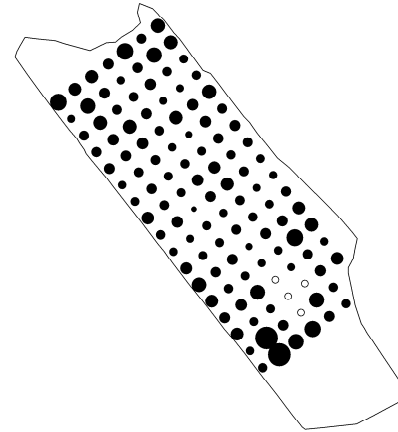

COVGRASS  
2010

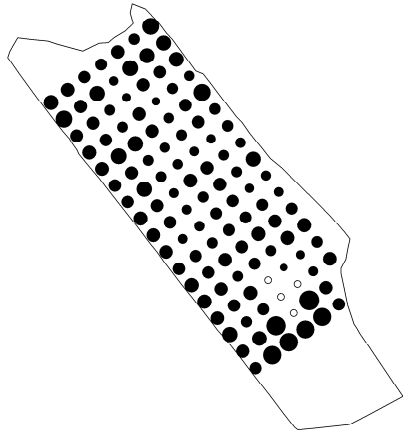

COVGRASS  
2011

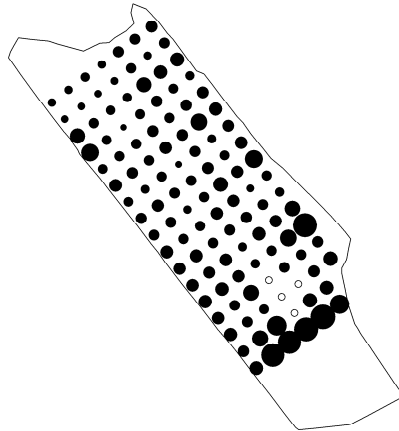

Figure S6

COVWOOD  
2006

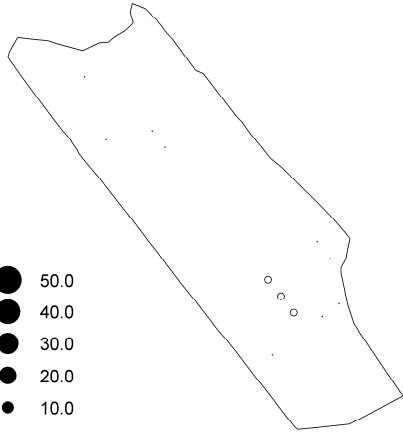

COVWOOD  
2007

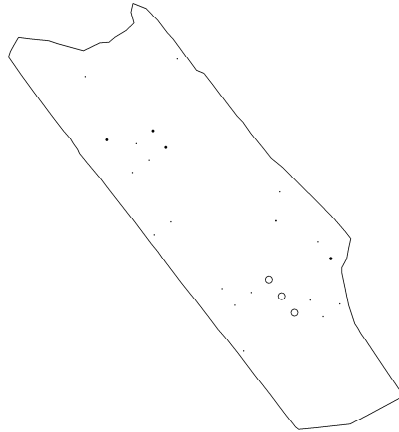

COVWOOD  
2008

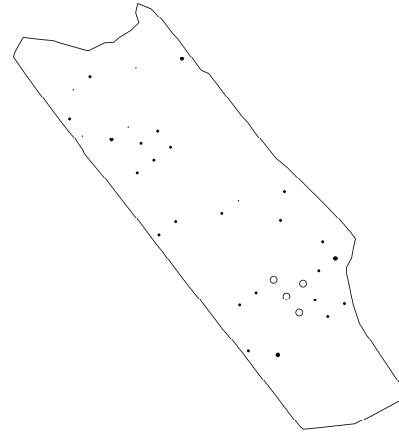

COVWOOD  
2009

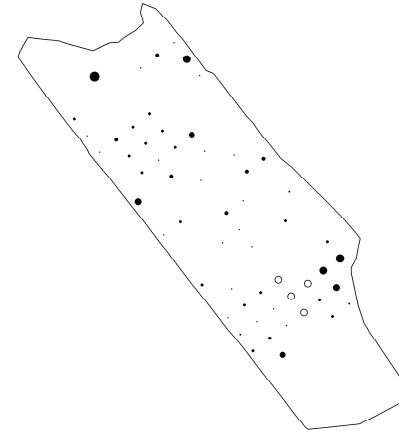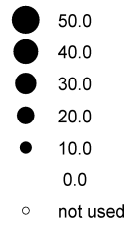

COVWOOD  
2010

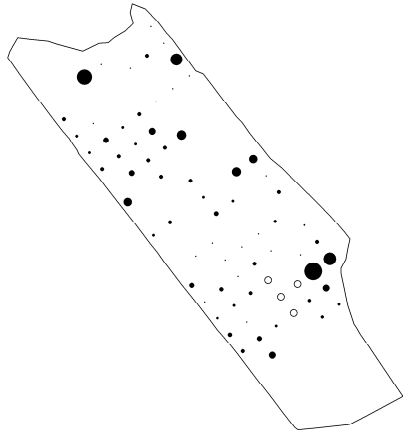

COVWOOD  
2011

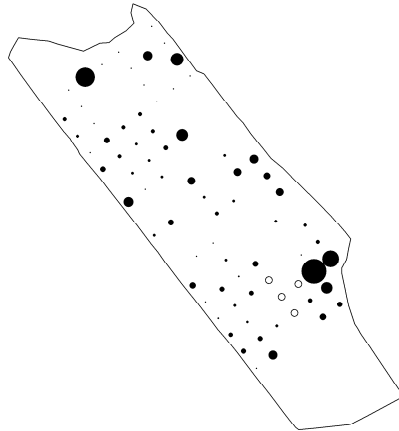

Figure S7

PROPANN  
2006

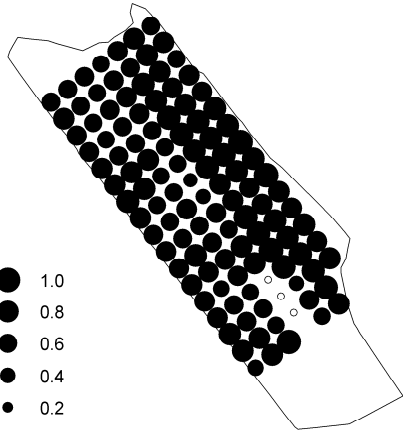

PROPANN  
2007

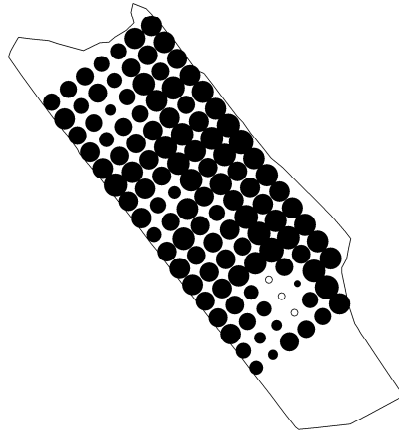

PROPANN  
2008

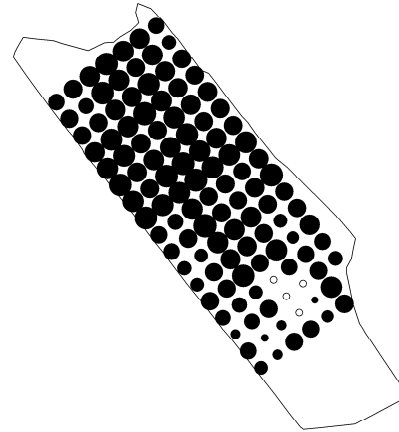

PROPANN  
2009

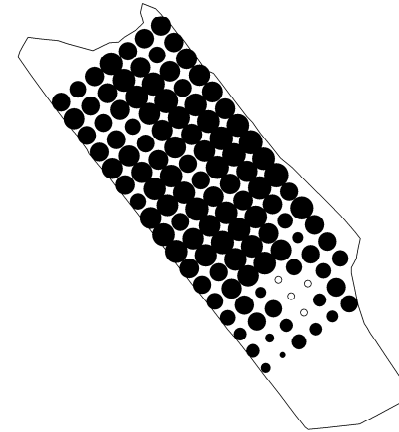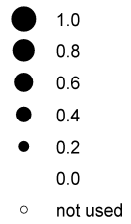

PROPANN  
2010

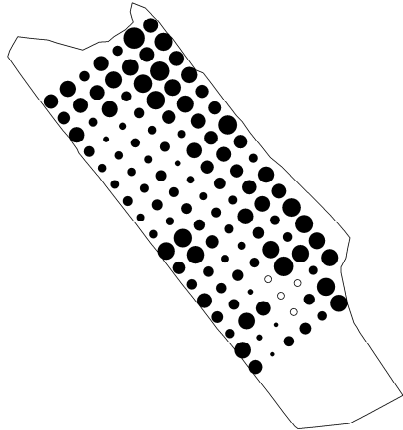

PROPANN  
2011

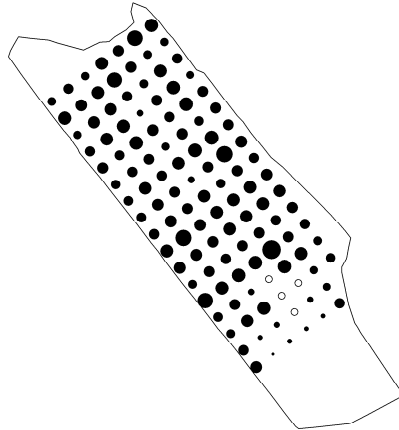

Figure S8

PROPERB  
2006

PROPERB  
2007

PROPERB  
2008

PROPERB  
2009

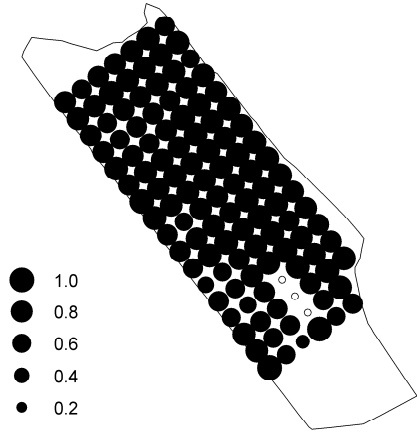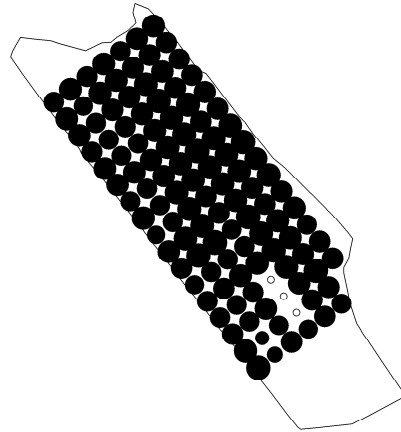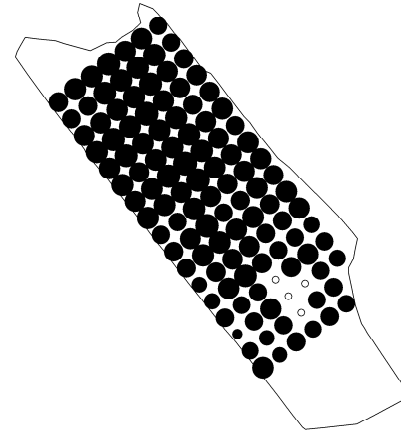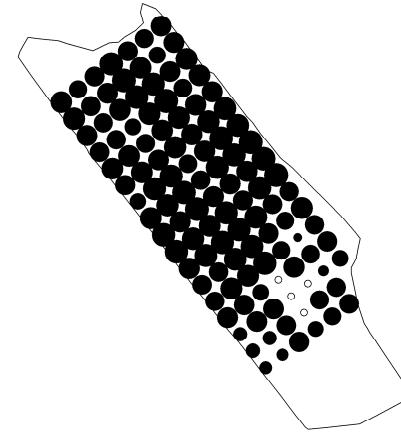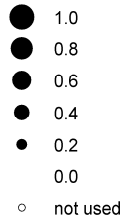

PROPERB  
2010

PROPERB  
2011

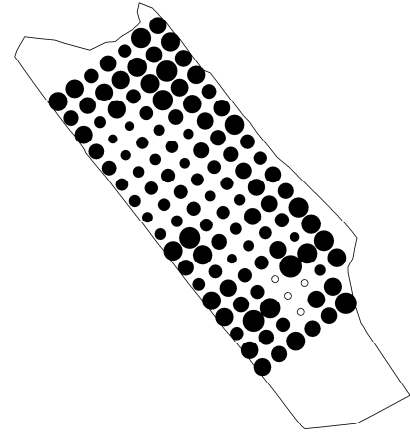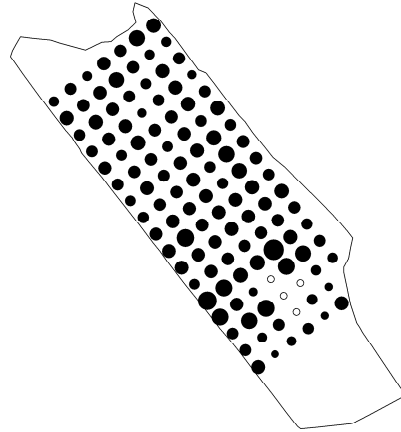

Figure S9

PROPGRASS  
2006

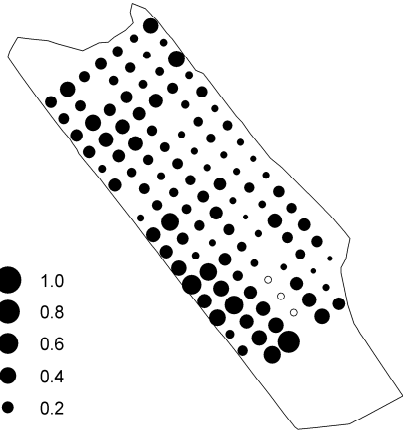

PROPGRASS  
2007

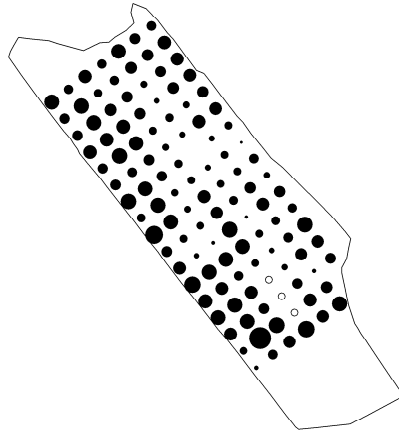

PROPGRASS  
2008

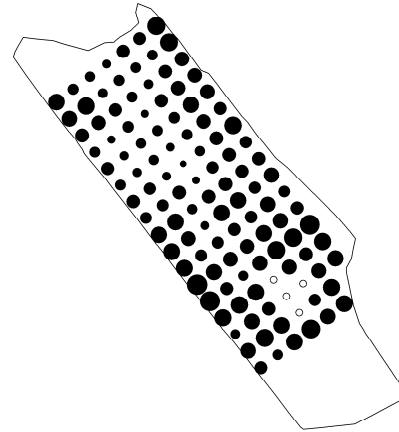

PROPGRASS  
2009

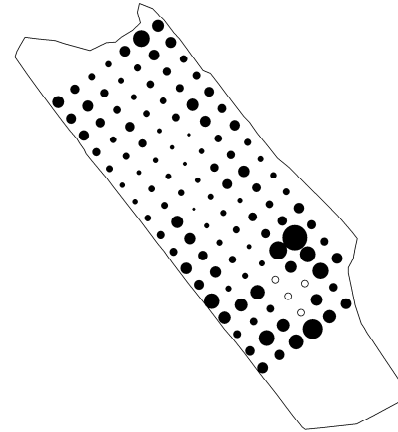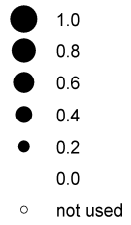

PROPGRASS  
2010

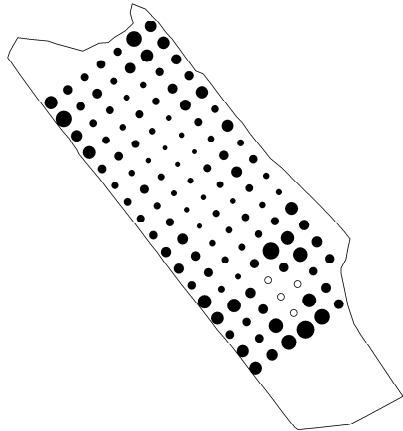

PROPGRASS  
2011

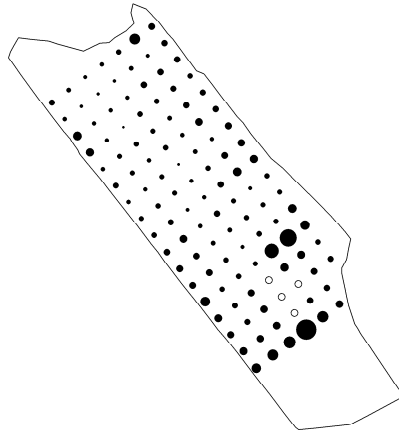

Figure S10

PROPFAB  
2006

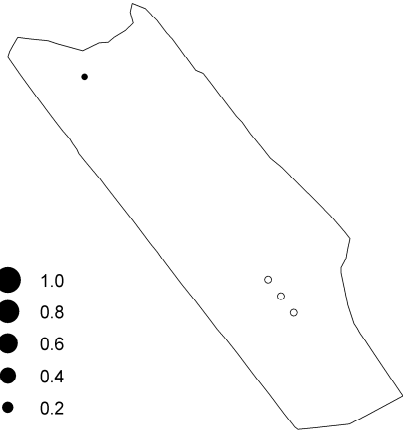

PROPFAB  
2007

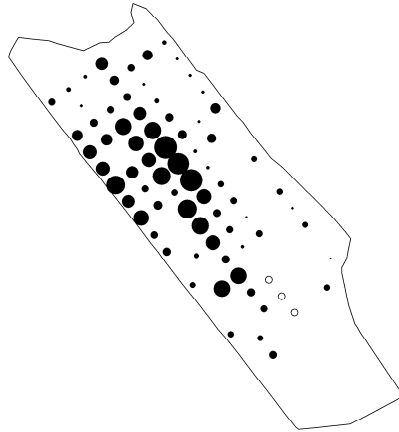

PROPFAB  
2008

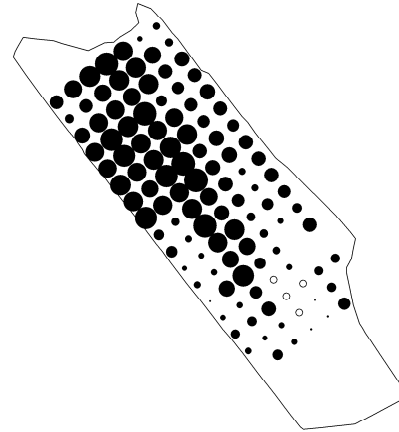

PROPFAB  
2009

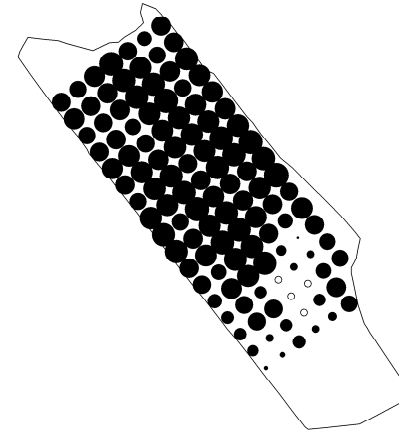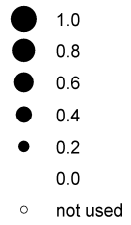

PROPFAB  
2010

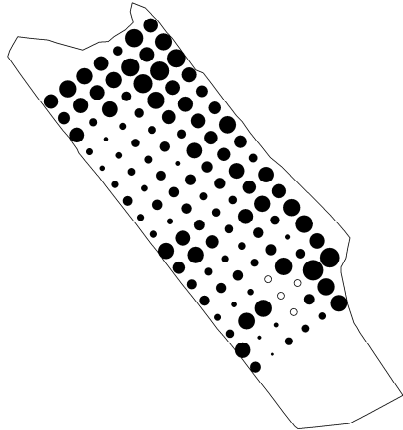

PROPFAB  
2011

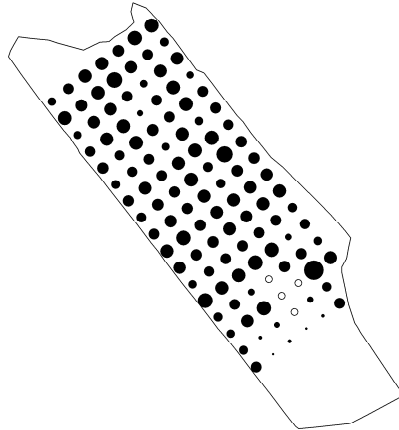

Figure S11

PROPWOOD  
2006

PROPWOOD  
2007

PROPWOOD  
2008

PROPWOOD  
2009

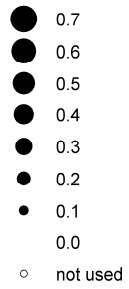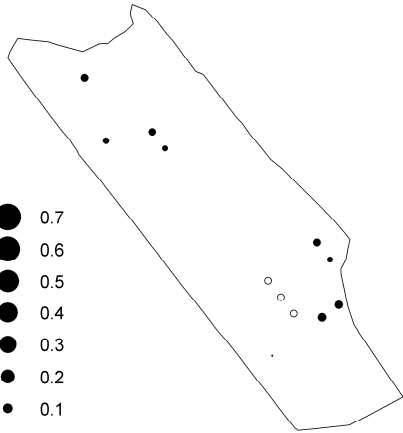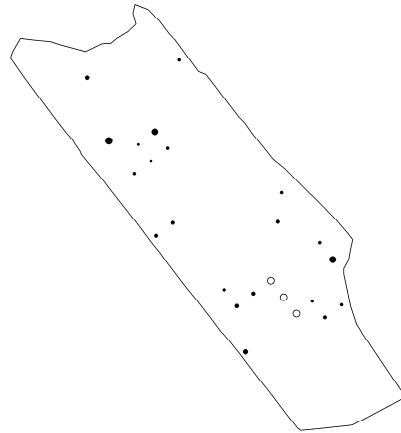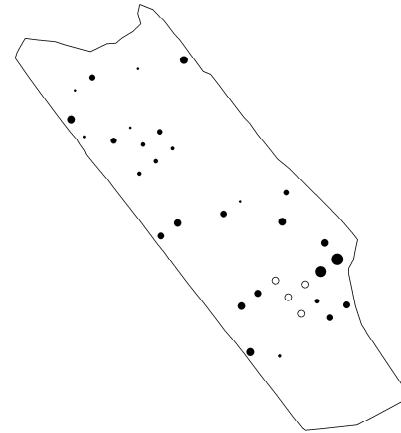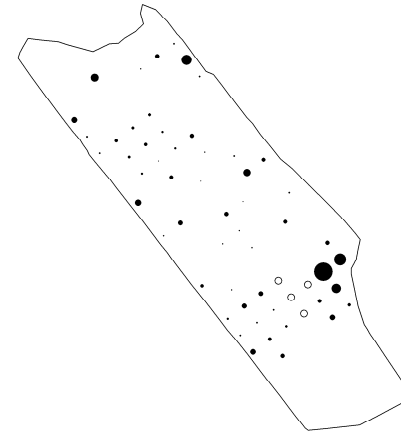

PROPWOOD  
2010

PROPWOOD  
2011

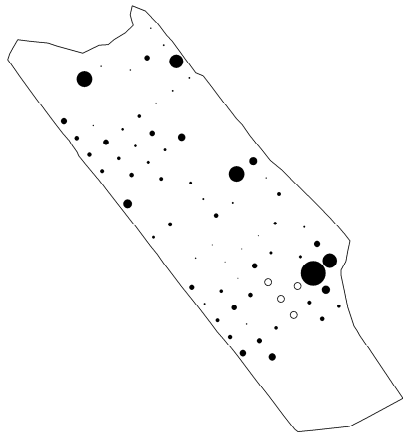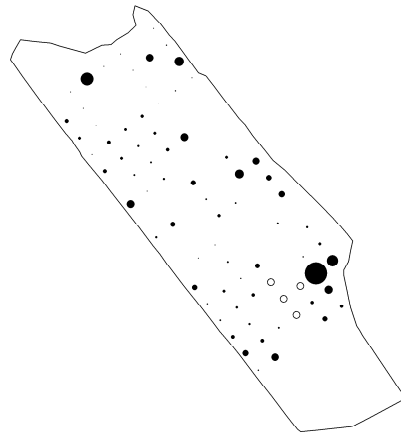

Figure S12

CORGP  
2005

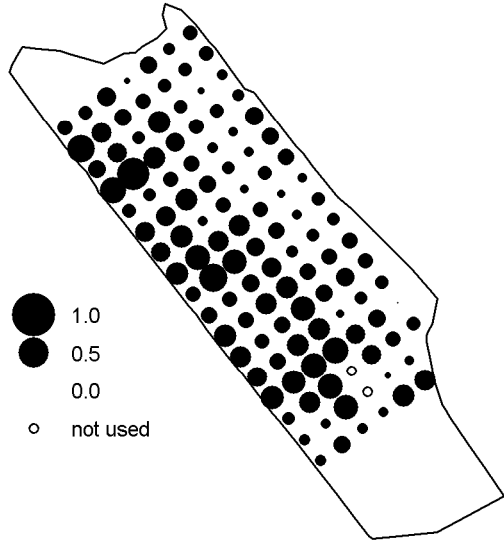

GRAVCONT  
2005

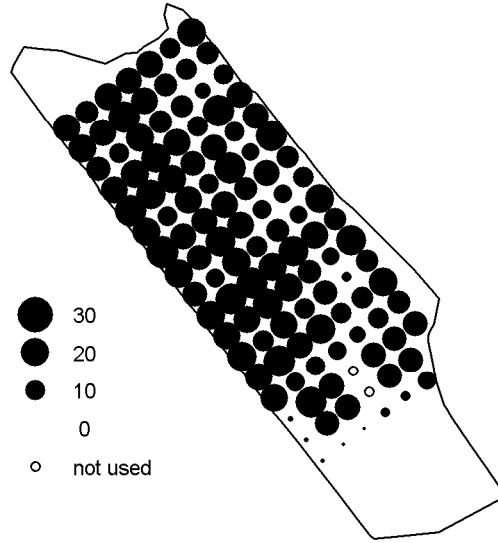

MSAND  
2005

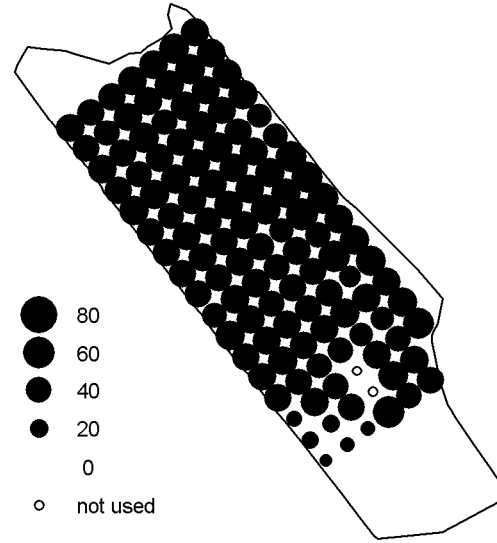

Figure S13



GAUGE  
2006

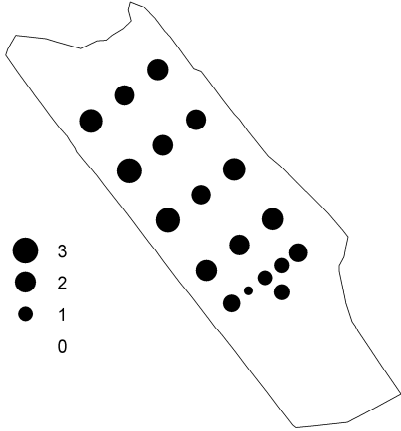

GAUGE  
2007

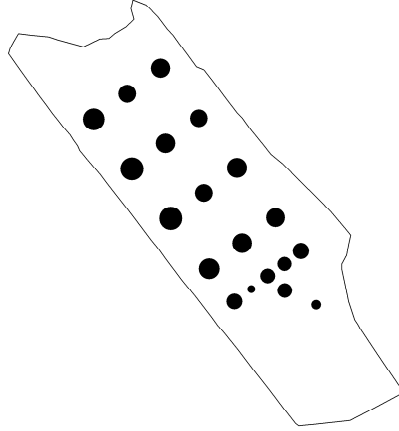

GAUGE  
2008

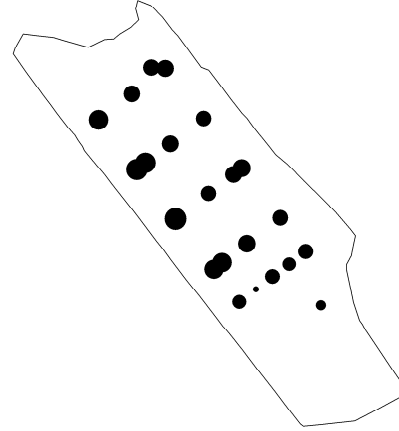

GAUGE  
2009

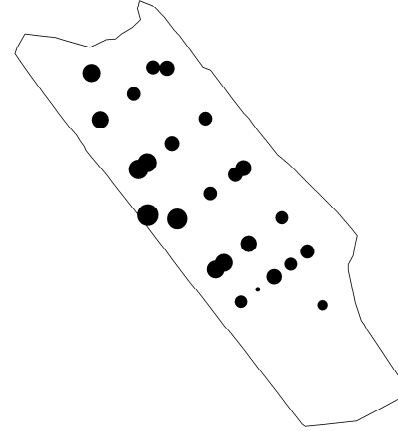

GAUGE  
2010

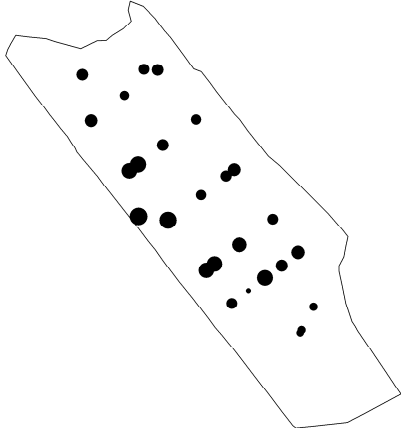

GAUGE  
2011

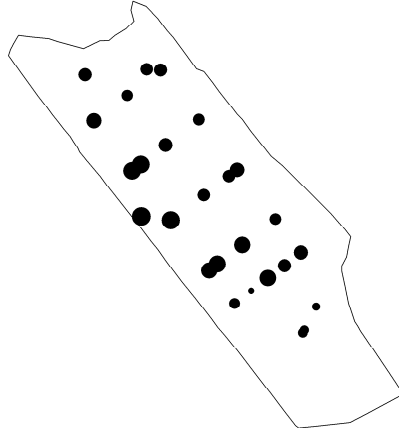

Figure S14

VEGHEIGHT  
2008/9

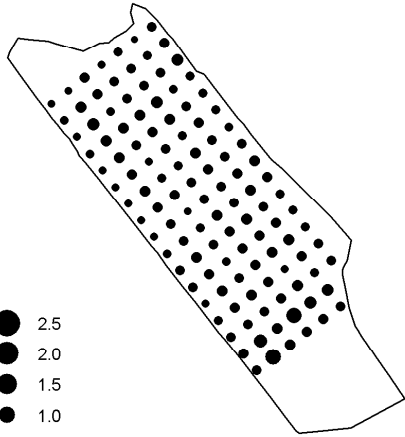

VEGHEIGHT  
2009/8

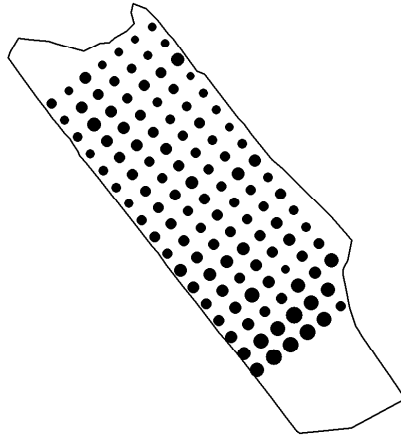

VEGHEIGHT  
2010/10

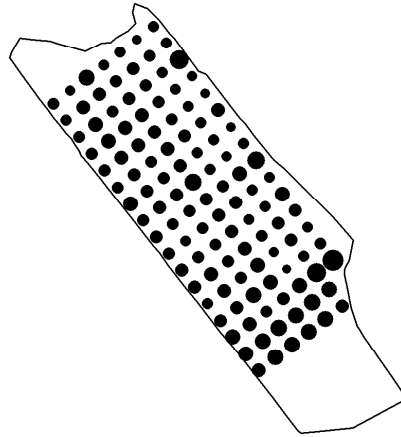

VEGHEIGHT  
2011/5

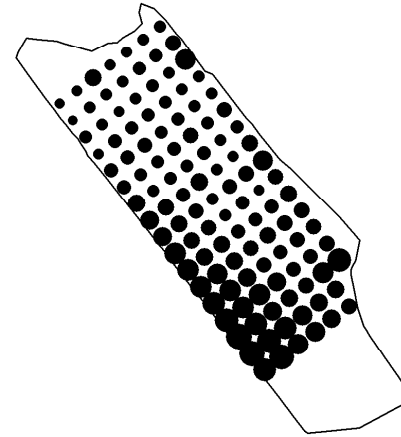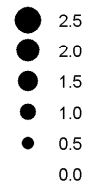

Figure S15

VEGDENS  
2008/9

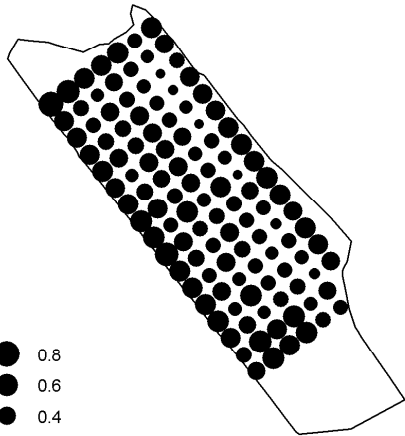

VEGDENS  
2009/8

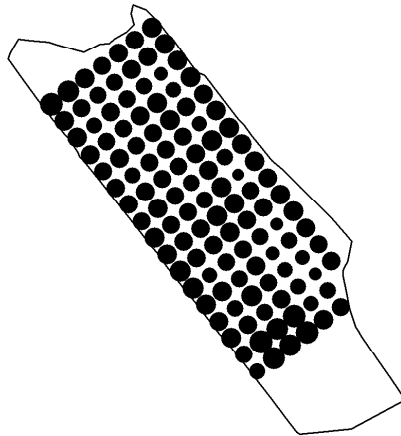

VEGDENS  
2010/10

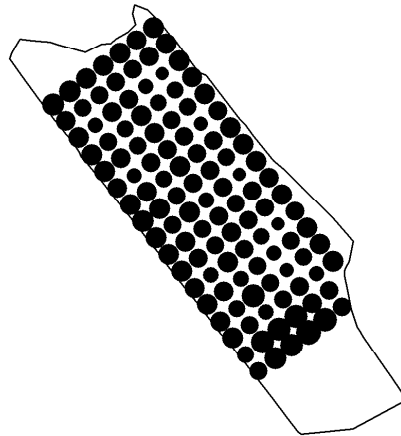

VEGDENS  
2011/5

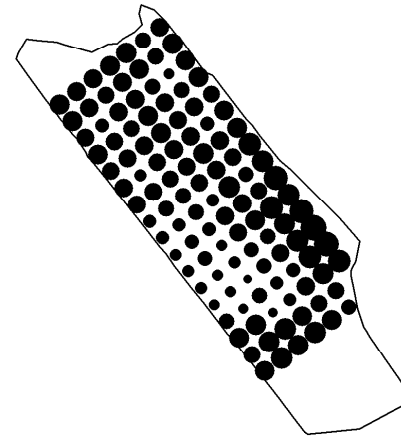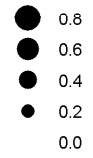

Figure S16

VEGDH  
2008/9

VEGDH  
2009/8

VEGDH  
2010/10

VEGDH  
2011/5

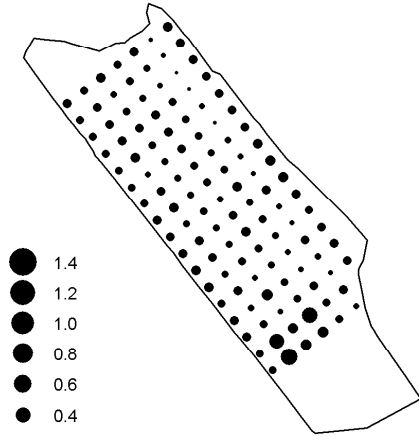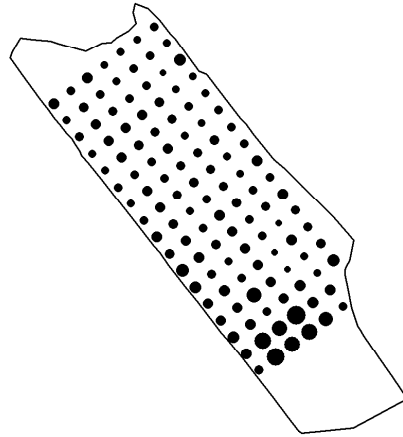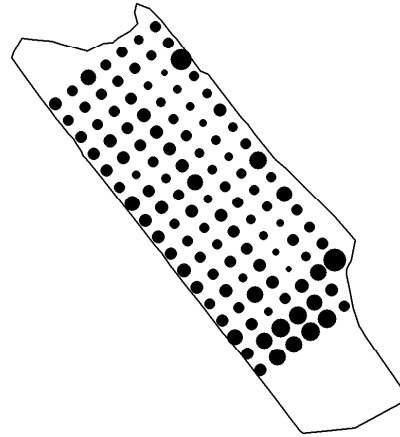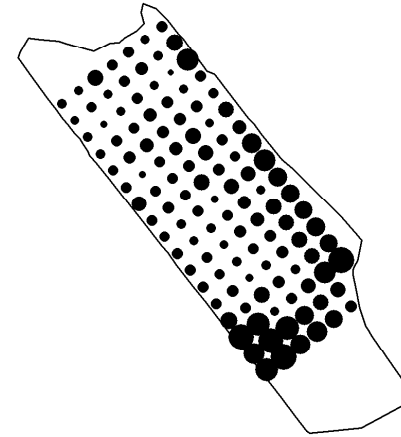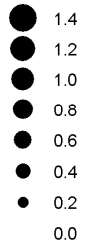

Figure S17

RILLR  
2008/9

RILLR  
2009/8

RILLR  
2010/10

RILLR  
2011/5

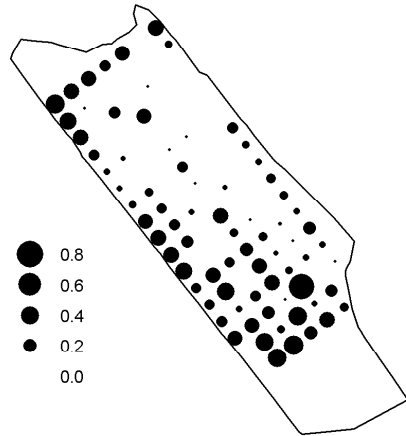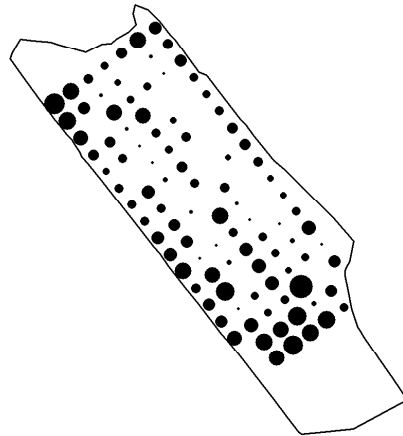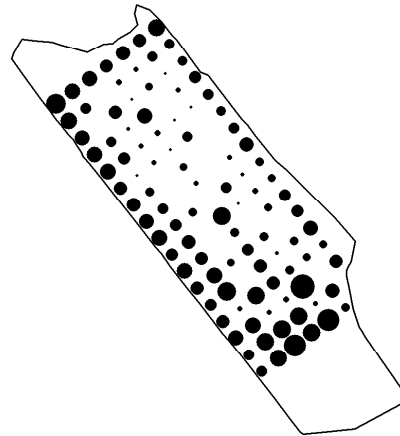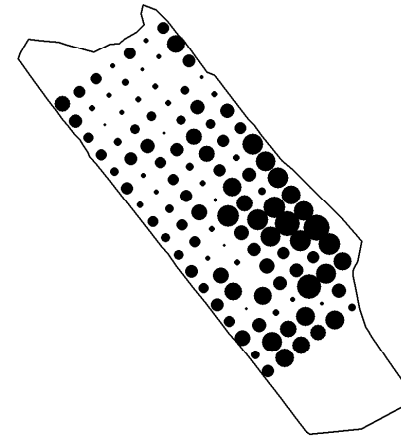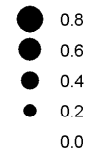

Figure S18

RELEN  
2008/9

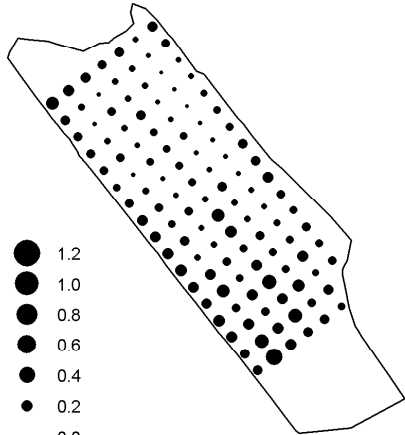

RELEN  
2009/8

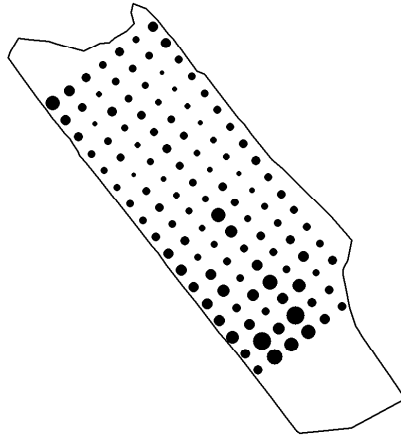

RELEN  
2010/10

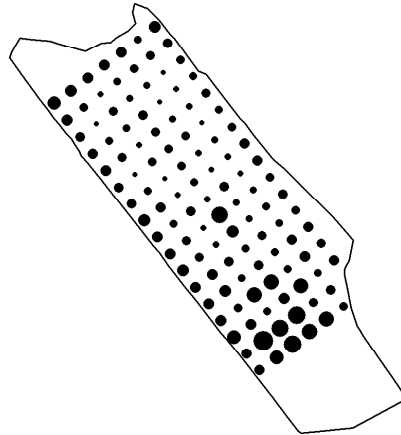

RELEN  
2011/5

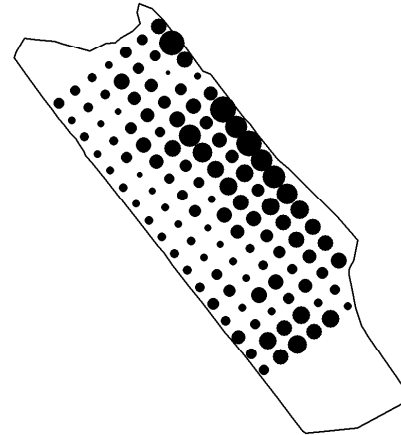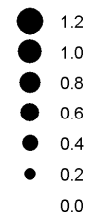

Figure S19

DHEIGHT  
2008/9

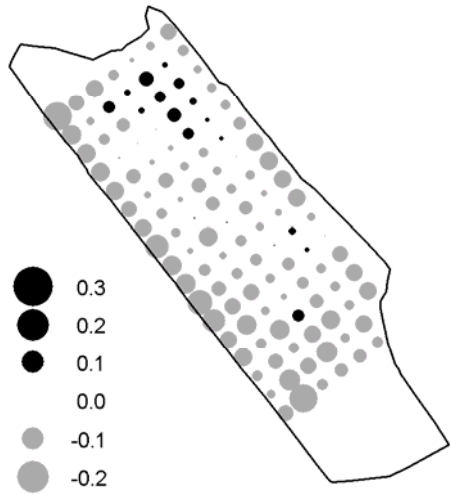

DHEIGHT  
2009/5

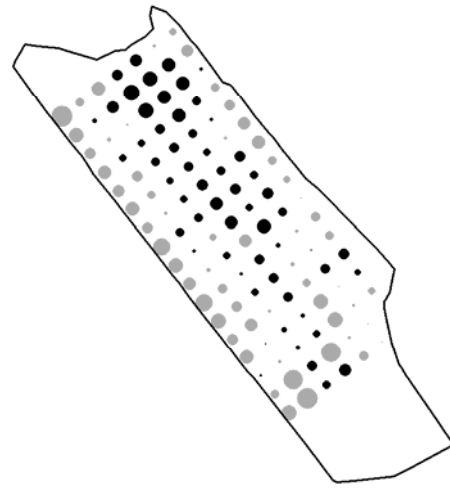

DHEIGHT  
2010/4

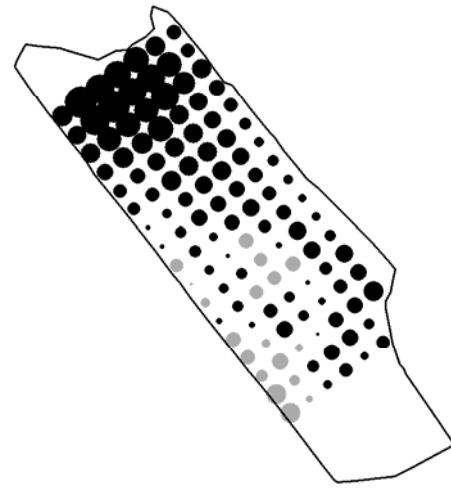

Figure S20

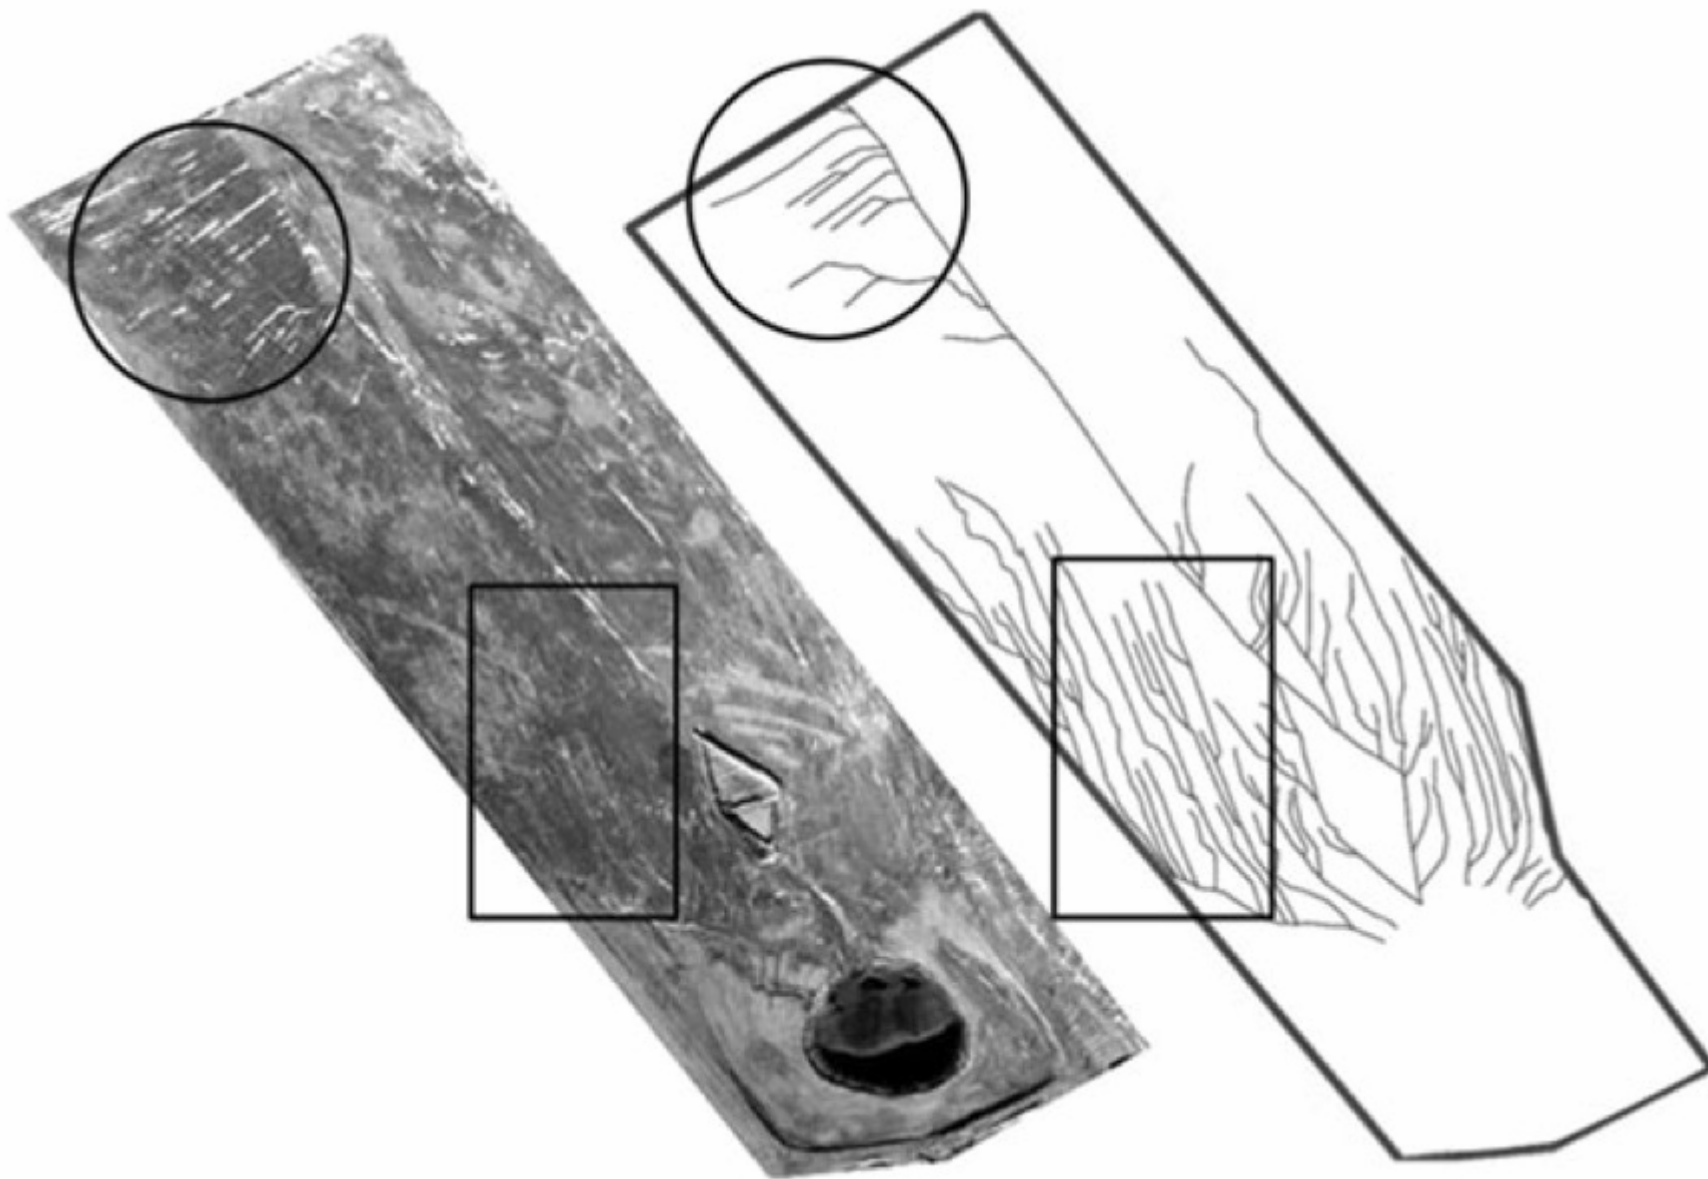

Figure S21

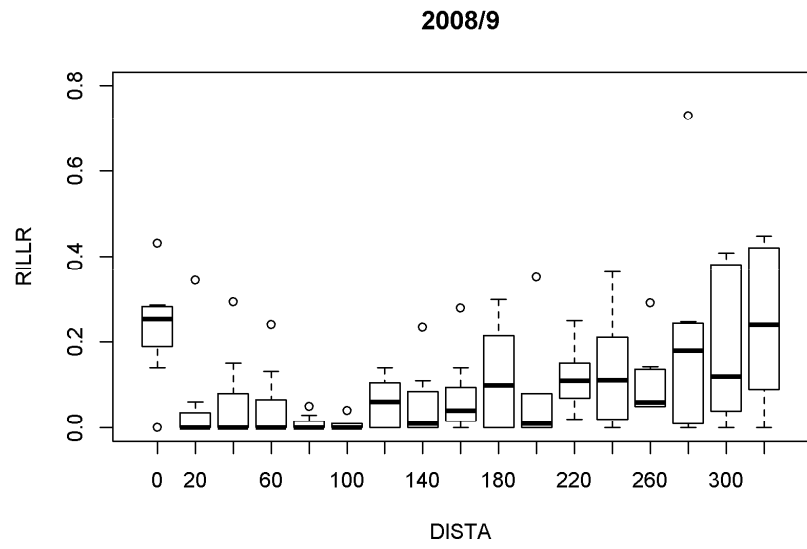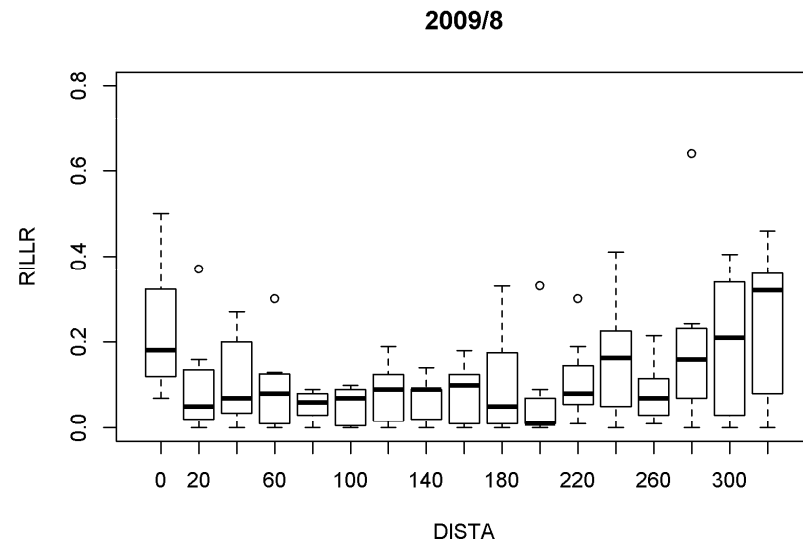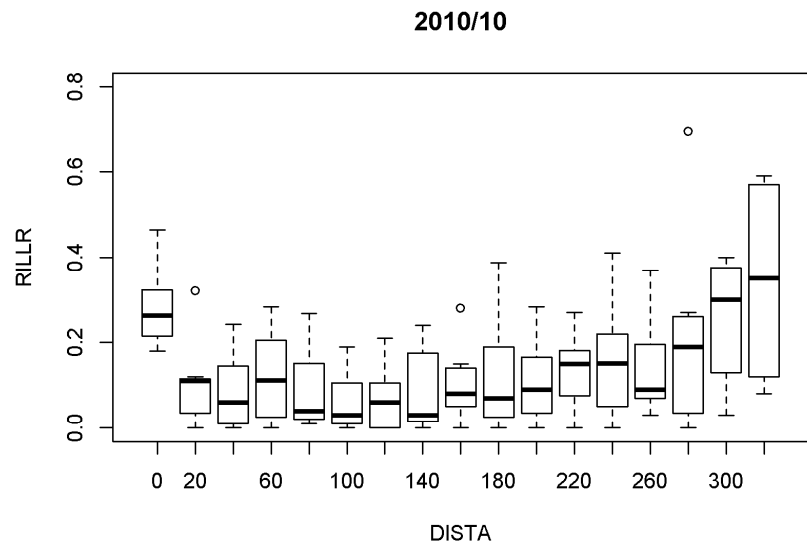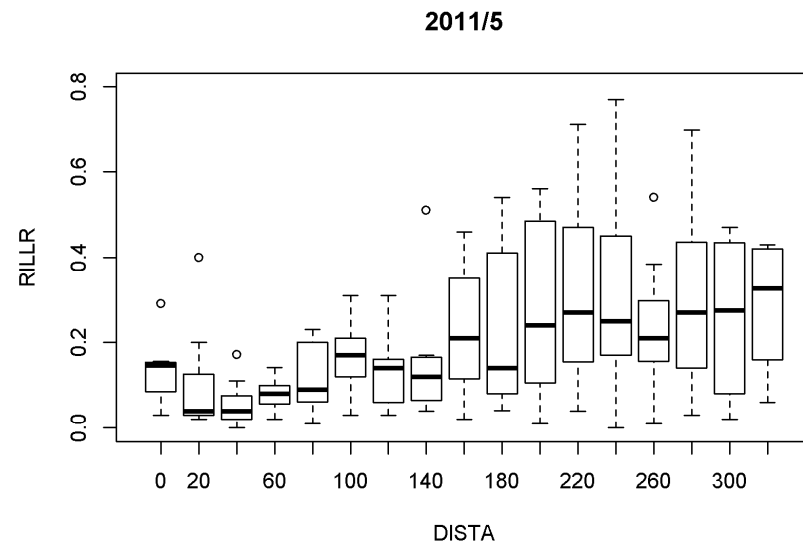

Figure S22

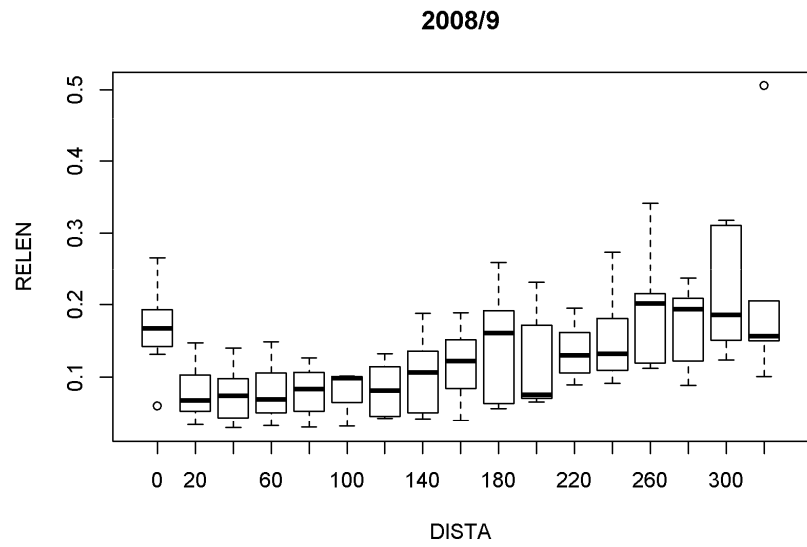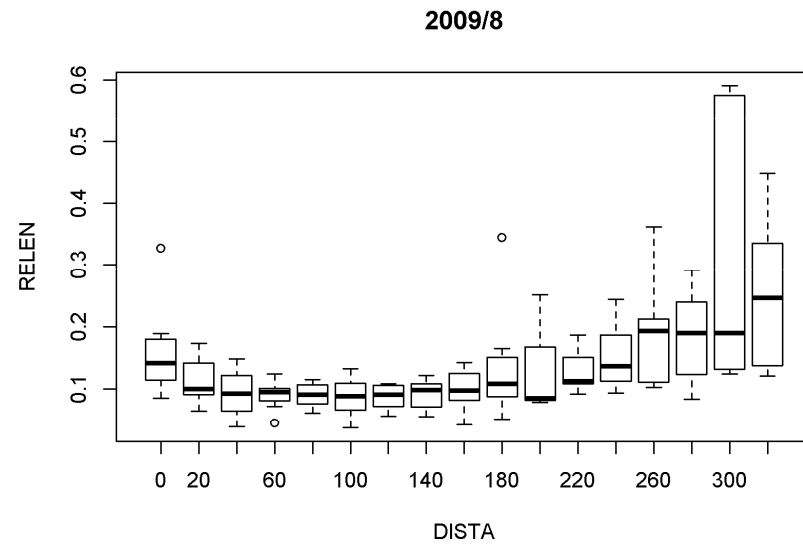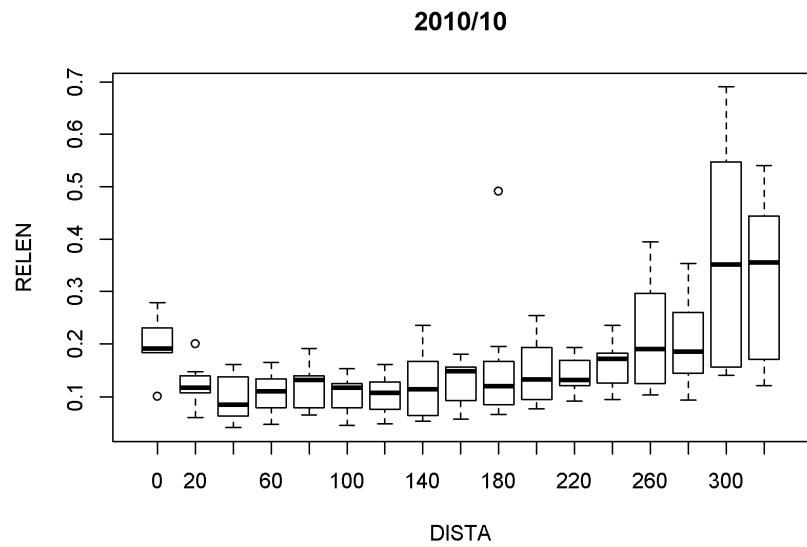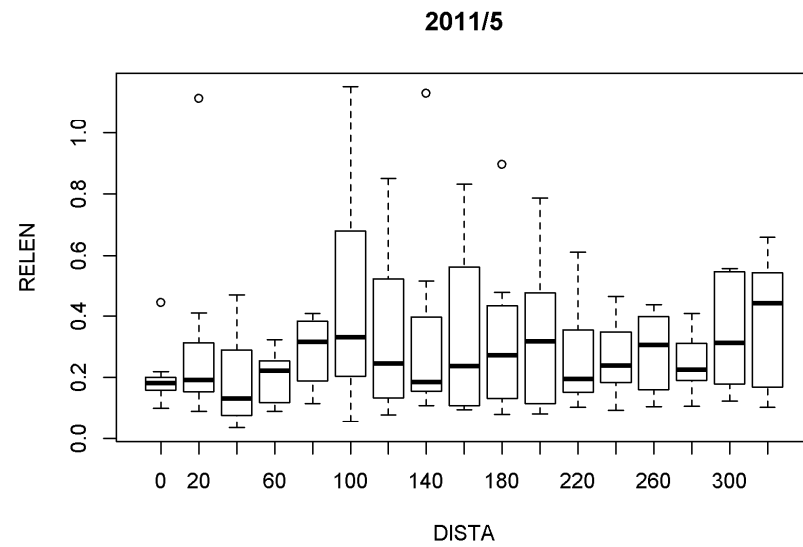

Figure S23
